# Supplementary material for: Pressure-controlled ventilation-volume guaranteed (PCV-VG) for postoperative pulmonary complications: a protocol for a systematic review with meta-analysis and trial sequential analysis
Source: Research Square preprint supplement (doi:10.21203/rs.3.rs-435510/v1), 2021-04-20
Supplement: Supplementary file 2 [file a5088c30978eb899fb2d99d0.docx]

**Search strategy**

***Search strategy of PubMed as follows:***

**#1** (((((((((((((((Pressure controlled volume guaranteed[Title/Abstract]) OR (Pressure-controlled volume-guaranteed[Title/Abstract])) OR (Pressure-controlled Ventilation with Volume Guarantee[Title/Abstract])) OR (Pressure-controlled volume guaranteed[Title/Abstract])) OR (pressure-controlled ventilation-volume guaranteed[Title/Abstract])) OR (pressure-controlled ventilation volume guaranteed[Title/Abstract])) OR (Pressure-controlled ventilation with volume-guarantee[Title/Abstract])) OR (pressure support ventilation with volume guarantee[Title/Abstract])) OR (pressure support ventilation plus volume guarantee[Title/Abstract])) OR (pressure support plus volume guarantee[Title/Abstract])) OR (Volume-guaranteed pressure-support[Title/Abstract])) OR (volume-guaranteed pressure-regulated[Title/Abstract])) OR (PCV-VG[Title/Abstract])) OR (Dual controlled ventilation[Title/Abstract])) OR (Pressure Regulated Volume Controlled[Title/Abstract])) OR (PRVC[Title/Abstract])

**#2** (Surgical Procedures, Operative [MeSH Major Topic]) OR (((((((Operat*) OR (surger*)) OR (surgical)) OR (intraoperat*)) OR (intra-operat*)) OR (Peri-operat*)) OR (Perioperat*))

**#3** ((((((controlled clinical trial [Publication Type]) OR (randomized controlled trial [Publication Type])) OR (randomized [Title/Abstract])) OR (randomized [Title/Abstract])) OR (Placebo [Title/Abstract])) OR (randomly [Title/Abstract])) OR (Clinical trial [Title])

**#4** (animals [MeSH Terms]) NOT ((human [MeSH Terms]) AND (animals [MeSH Terms]))

**#5** #1 and #2 and #3not #4

***Search strategy of Cochrane library as follows:***

**#1** MeSH descriptor: [Surgical Procedures, Operative] explode all trees

**#2** (Operat*):ti,ab,kw OR(surger*):ti,ab,kw OR (surgical):ti,ab,kw OR(intraoperat*):ti,ab,kw OR(intra-operat*):ti,ab,kw OR(Peri-operat*):ti,ab,kw OR(Perioperat*):ti,ab,kw

**#3** #1 OR # 2

**#4** (Pressure controlled volume guaranteed):ti,ab,kw OR (Pressure-controlled volume-guaranteed):ti,ab,kw OR (Pressure-controlled Ventilation with Volume Guarantee):ti,ab,kw OR (Pressure-controlled volume guaranteed):ti,ab,kw OR (pressure-controlled ventilation-volume guaranteed):ti,ab,kw OR (pressure-controlled ventilation volume guaranteed):ti,ab,kw OR (Pressure-controlled ventilation with volume-guarantee):ti,ab,kw OR (pressure support ventilation with volume guarantee):ti,ab,kw OR (pressure support ventilation plus volume guarantee):ti,ab,kw OR (pressure support plus volume guarantee):ti,ab,kw OR (Volume-guaranteed pressure-support):ti,ab,kw OR (volume-guaranteed pressure-regulated):ti,ab,kw OR (PCV-VG):ti,ab,kw OR (Dual controlled ventilation):ti,ab,kw OR (Pressure Regulated Volume Controlled):ti,ab,kw OR (PRVC):ti,ab,kw

**#5** (controlled clinical trial):pt OR (randomized controlled trial):pt OR (random*): ti,ab,kw OR (Clinical trial):ti,ab,kw

**#6** #3 and # 4 and # 5

***Search strategy of Web of Science as follows:***

**#1** TS=(Pressure controlled volume guaranteed or Pressure-controlled volume-guaranteed or Pressure-controlled Ventilation with Volume Guarantee or Pressure-controlled volume guaranteed or pressure-controlled ventilation-volume guaranteed or pressure-controlled ventilation volume guaranteed or pressure support ventilation with volume guarantee or pressure support ventilation plus volume guarantee or pressure support plus volume guarantee or Volume-guaranteed pressure-support or volume-guaranteed pressure-regulated or PCV-VG or Dual controlled ventilation or Pressure Regulated Volume Controlled)

**#2** TS=(Operat* or surger* or surgical or intraoperat* or intra-operat* or Peri-operat* or Perioperat*)

**#3** TS=(random* or Clinical trial)

**#4** #1 and #2 and #3

***Search strategy for Ovid Medline as follows:***

**#1** (Pressure controlled volume guaranteed or Pressure-controlled volume-guaranteed or Pressure-controlled Ventilation with Volume Guarantee or Pressure-controlled volume guaranteed or pressure-controlled ventilation-volume guaranteed or pressure-controlled ventilation volume guaranteed or pressure support ventilation with volume guarantee or pressure support ventilation plus volume guarantee or pressure support plus volume guarantee or Volume-guaranteed pressure-support or volume-guaranteed pressure-regulated or PCV-VG or Dual controlled ventilation or Pressure Regulated Volume Controlled).af.

**#2** (Operat* or surger* or surgical or intraoperat* or intra-operat* or Peri-operat* or Perioperat*).af.

**#3** (random* or Clinical trial).af.

**#4** #1 and #2 and #3

***Search strategy for Embase as follows:***

**#1** (Pressure controlled volume guaranteed or Pressure-controlled volume-guaranteed or Pressure-controlled Ventilation with Volume Guarantee or Pressure-controlled volume guaranteed or pressure-controlled ventilation-volume guaranteed or pressure-controlled ventilation volume guaranteed or pressure support ventilation with volume guarantee or pressure support ventilation plus volume guarantee or pressure support plus volume guarantee or Volume-guaranteed pressure-support or volume-guaranteed pressure-regulated or PCV-VG or Dual controlled ventilation or Pressure Regulated Volume Controlled). ti,ab.

**#2** operat*:ab,ti OR surger*:ab,ti OR surgical:ab,ti OR 'surgical equipment':ab,ti OR 'peroperative complication':ab,ti OR perioperat*:ab,ti

**#3** 'randomized controlled trial':ab,ti OR 'clinical trial':ab,ti

**#4** #1 and #2 and #3
